# Supplementary material
Source: PubMed Central journal article supplement (PMC6796851)
Supplement: 41422_2019_213_MOESM2_ESM.pdf [file 41422_2019_213_MOESM2_ESM.pdf]

a

### HMEJ (Homology-mediated end joining)

[Marker knock-in at C terminal / Large deletion]

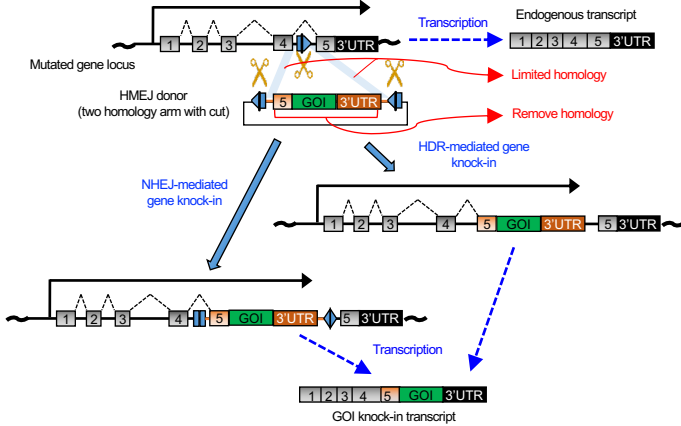

[Point mutation / frameshift]

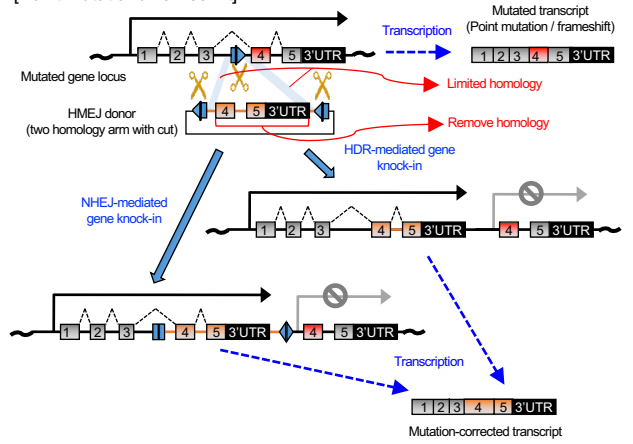

b

### SATI (single homology arm donor)

[Marker knock-in at C terminal / Large deletion]

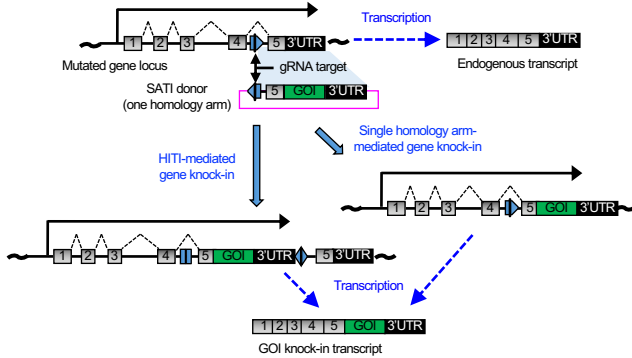

[Point mutation / frameshift]

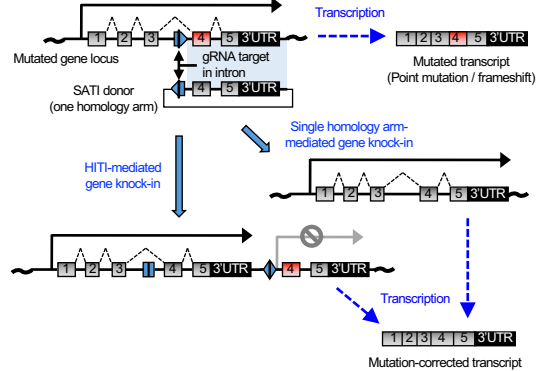

c

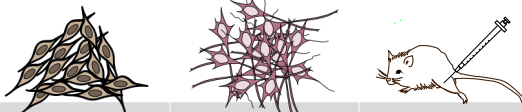

| Applicability | Dividing cells | Non-dividing cells | <i>In vivo</i> | Note                                                             |
|---------------|----------------|--------------------|----------------|------------------------------------------------------------------|
| HDR           | ○              | ×                  | △              | Less efficiency in non-dividing cells                            |
| HITI          | ○              | ○                  | ○              | Cannot apply for point mutation                                  |
| HMEJ          | ○              | ○                  | △              | Less flexibility of donor design, targeting locus and cell types |
| SATI          | ○              | ○                  | ○              |                                                                  |

**Supplementary Figure S2 | Schematic representation of HMEJ and intron-targeting SATI**

**methods. a** Schematic representation of the HMEJ-mediated intronic gene-knock-in method. The donor DNA includes an inserting cassette, two DSB induction sites and two-homology arms where is identical to target genome. In order to avoid undesired recombination, it is important to lack any homology sequences from the inserting cassette (i.e. splicing acceptor, exon (s), GOI and 3'UTR). Furthermore, in order to avoid undesired splicing when the insert is integrated by NHEJ, the left homology arm should not include splicing acceptor. HMEJ allows DNA knock-in via conventional HDR or NHEJ. Under the above limitations for donor design, HMEJ-mediated gene knock-in is also able to target a broad range of mutations and cell types although less efficient in dividing cells due to competition of conventional HDR. Furthermore, it is necessary to carry two homology arms, which may beyond the capacity of AAV and limit the application for *in vivo*. **b** Schematic representation of the new intronic gene-knock-in method, SATI. The donor DNA includes DSB induction site and one-homology arm where is identical to target genome. SATI allows DNA knock-in via single homology arm mediated HDR (oaHDR) or homology independent NHEJ-based HITI, enabling to target a broad range of mutations and cell types. **c** Summary for difference of applicability between gene editing methods used in this study. Red circle means “fully applicable,” red triangle means “partially applicable,” and red cross means “difficult to apply.” Weak points of each gene editing method are indicated in the note (right).
