# Supplementary material
Source: PubMed Central journal article supplement (PMC6796851)
Supplement: 41422_2019_213_MOESM6_ESM.pdf [file 41422_2019_213_MOESM6_ESM.pdf]

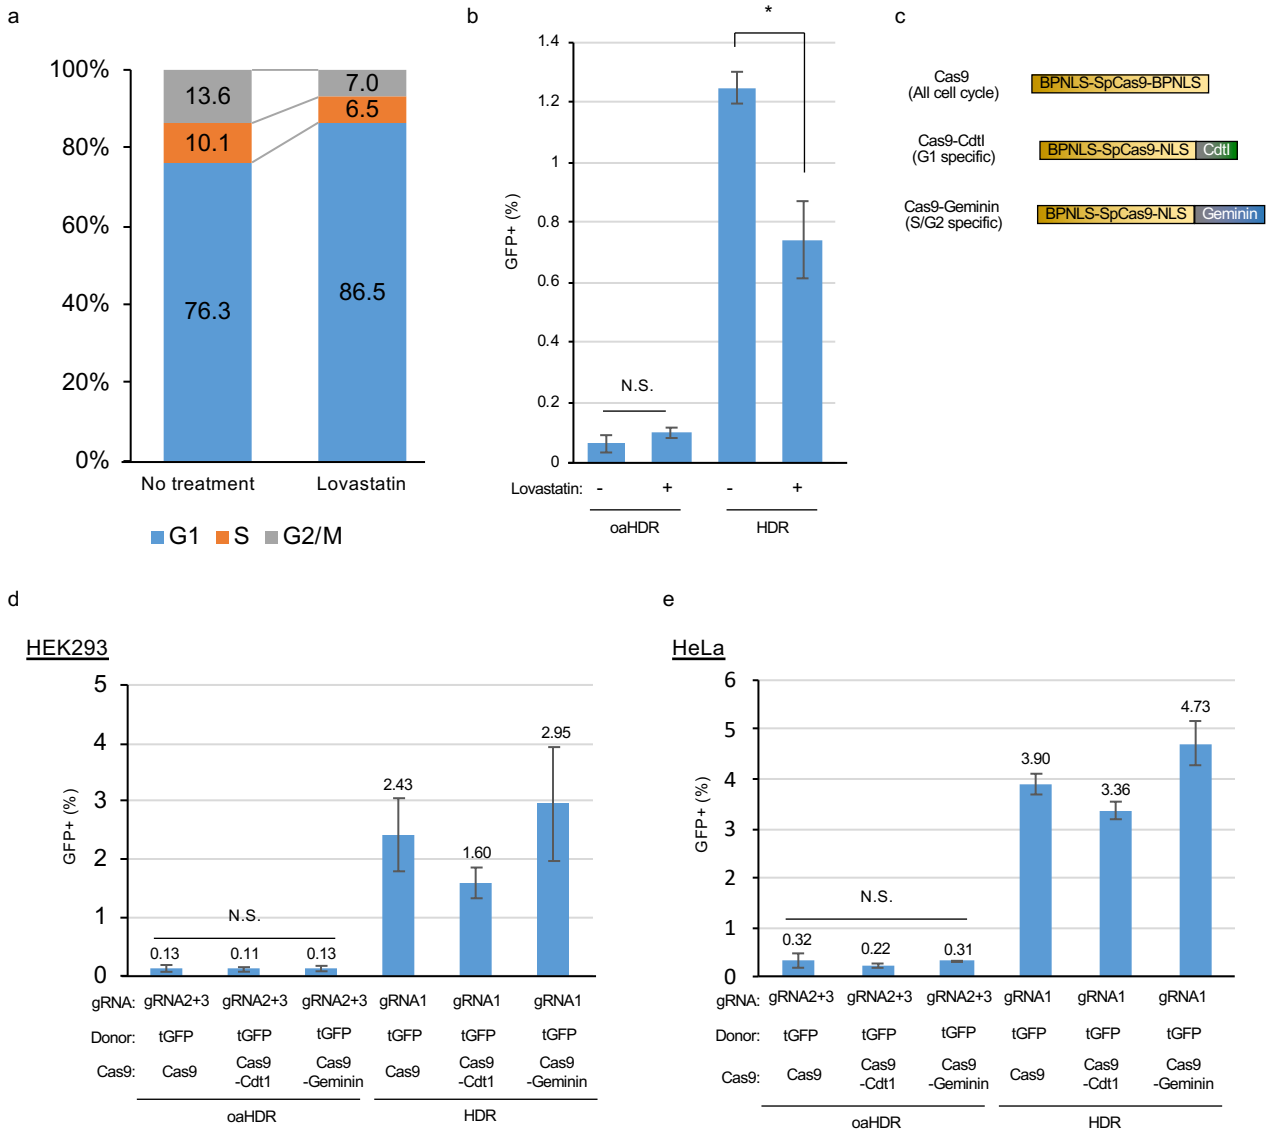

**Supplementary Figure S6 | Measurement of cell cycle dependent oaHDR activity in dividing cells.** **a** Cell cycle analysis by propidium iodide (PI) staining after treatment with/without 20  $\mu$ M Lovastatin, cell cycle inhibitor at G1 phase, for 2 days in GFP correction HeLa line. Efficiency of each cell cycle phase is indicated in graph (%). **b** oaHDR- and HDR-mediated gene knock-in percentages in GFP correction HeLa line with Lovastatin treatment. \* $P < 0.05$ . Data from three independent experiments in Unpaired Student's *t*-test. Data are represented as mean  $\pm$  s.e.m. **c** Structure of wild type Cas9 (Cas9), G1-phase specific Cas9 (Cas9-Cdt1) and S-M phase specific Cas9 (Cas9-Geminin). **d, e** oaHDR- and HDR-mediated gene knock-in% in GFP correction HEK293 (**d**) and HeLa (**e**) line with different Cas9 treatment. Actual efficiency (%) is indicated at above. Data are represented as mean  $\pm$  s.e.m. N.S. Not significant in Unpaired Student's *t*-test.
