# Supplementary material
Source: PubMed Central journal article supplement (PMC6796851)
Supplement: 41422_2019_213_MOESM7_ESM.pdf [file 41422_2019_213_MOESM7_ESM.pdf]

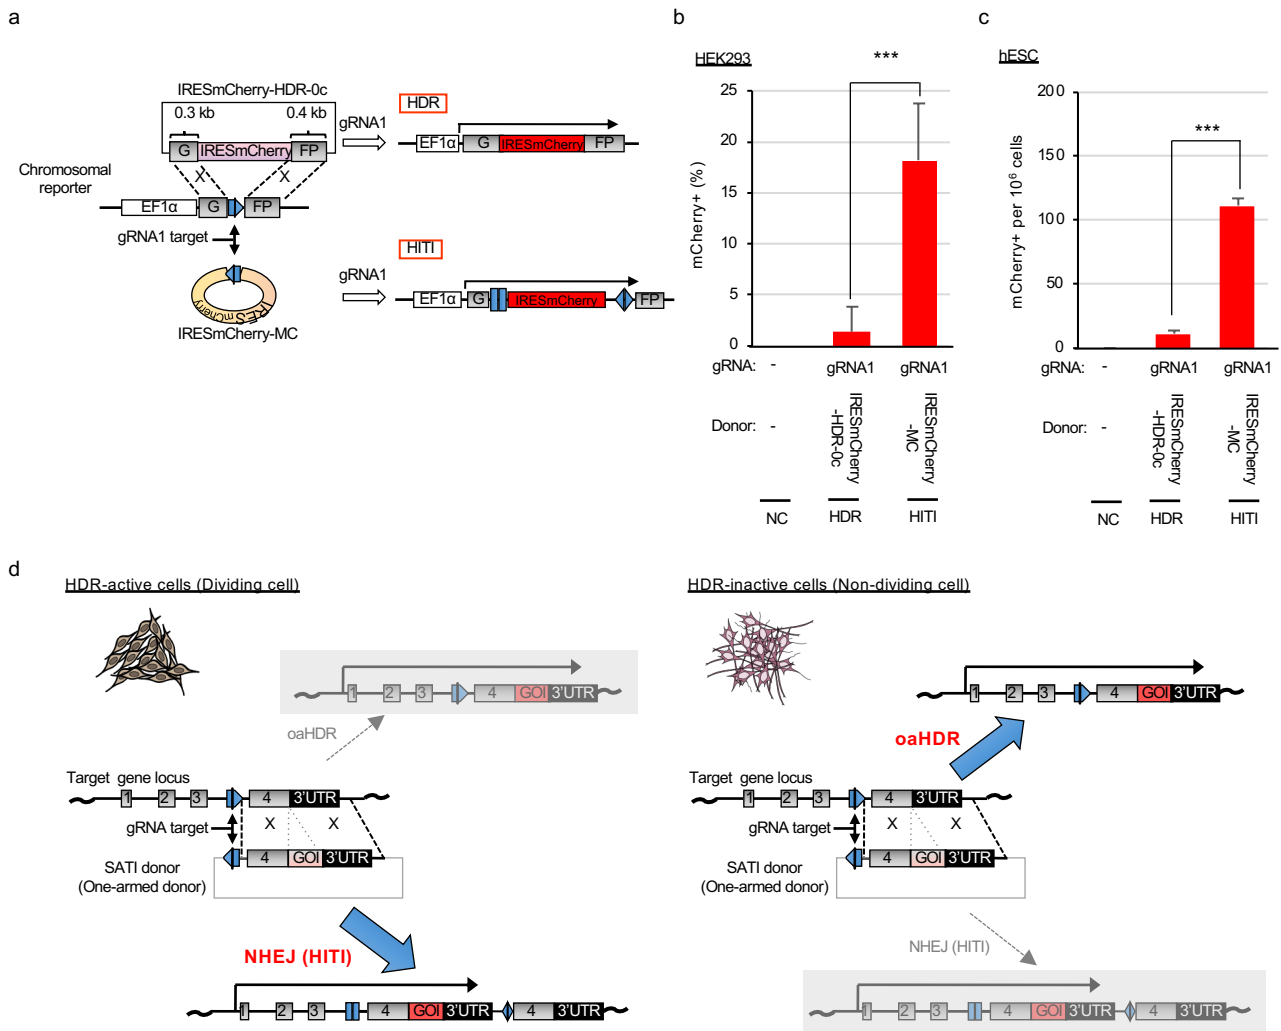

**Supplementary Figure S7 | HDR-, HITI- and oaHDR-mediated gene knock-in in different cell types.** **a** Schematic representation of gene targeting by HDR and HITI with mCherry reporter donor in the GFP-correction HEK293 and hESC line. HDR donor (IRESmCherry-HDR-0c) is inserted by HDR (top). HITI donor (IRESmCherry-MC) is inserted by HITI (bottom). **b, c** mCherry knock-in efficiency in HEK293 (**b**) and hES (**c**) cells. \*\*\* $P < 0.001$ . Data from three independent experiments in Unpaired Student's *t*-test. Data are represented as mean  $\pm$  s.e.m. **d** Schematic model of SATI conceptually from our observations in different cell types.
