# Supplementary material
Source: PubMed Central journal article supplement (PMC6796851)
Supplement: 41422_2019_213_MOESM9_ESM.pdf [file 41422_2019_213_MOESM9_ESM.pdf]

a

| Repair pathway       | Sub pathway           | Gene              | Clone ID (Sigma) |
|----------------------|-----------------------|-------------------|------------------|
| DSB repair           | Initial DSB resection | <i>Rad50</i>      | TRCN0000336380   |
|                      | NHEJ                  | <i>Ku70/Xrcc6</i> | TRCN0000321228   |
|                      |                       | <i>Ku80/Xrcc5</i> | TRCN0000312877   |
|                      | alt-NHEJ              | <i>Lig3</i>       | TRCN0000070980   |
|                      |                       | <i>Xrcc1</i>      | TRCN0000077239   |
|                      | HDR                   | <i>Rad51</i>      | TRCN0000012660   |
|                      | SSA                   | <i>Rad52</i>      | TRCN0000233363   |
|                      |                       | <i>Ercc1</i>      | TRCN0000238086   |
|                      |                       | <i>Ercc4/Xpf</i>  | TRCN0000175845   |
|                      | Cohesin formation     | <i>Smc5</i>       | TRCN0000241751   |
| Upstream activator   | <i>Rad18</i>          | TRCN0000124781    |                  |
| Mismatch repair      |                       | <i>Msh2</i>       | TRCN0000042496   |
| Base-excision repair |                       | <i>Apex1</i>      | TRCN0000304312   |

b

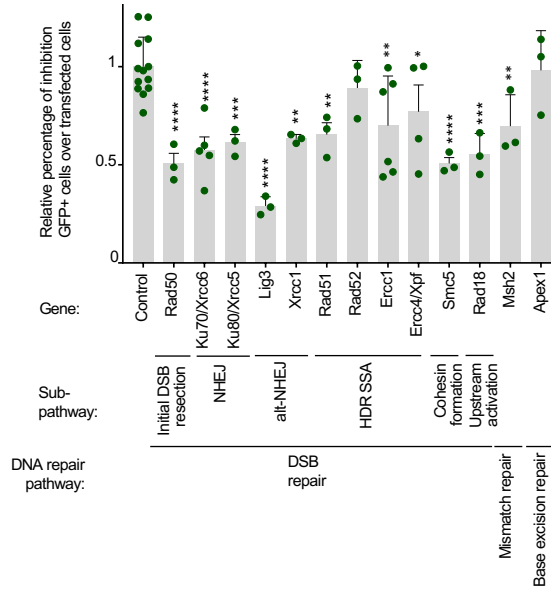

c

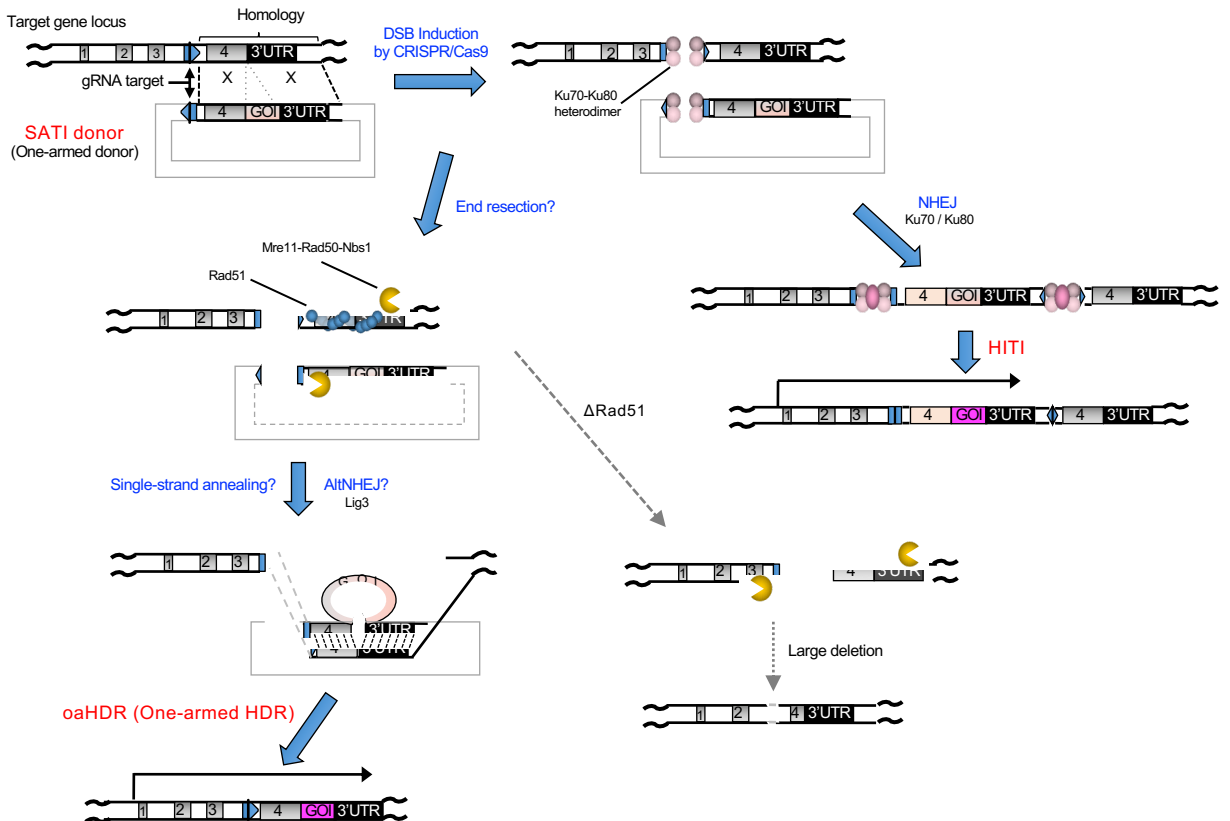

**Supplementary Figure S9 | oaHDR is a noncanonical HDR pathway mediated by multiple elements of DSB repair.** **a** Gene list of DNA repair related shRNA used in this study. **b** The effect of SATI knock-in efficiency in the presence of indicated shRNAs.  $n \geq 4$ . alt-NHEJ, alternative NHEJ. Data are represented as mean  $\pm$  s.e.m. The input data points are shown as green dots. *t*-test for analysis comparing each condition versus control transfected with pLKO-shRNA-scramble plasmid. \*\*\*\* $P < 0.0001$ , \*\*\* $P < 0.001$ , \*\*  $P < 0.01$  and \*  $P < 0.05$ . **c** Model of SATI donor mediated gene knock-in in the oaHDR and NHEJ pathways. Once DSB are induced by Cas9, Ku70/80 heterodimer ligates the break. In some case, end resection is happened by unknown mechanism, genome and/or double strand donor is exposed as single stand. Single strand annealing (SSA) or microhomology and Lig3-mediated Alternative NHEJ (AltNHEJ) is happened, and the GOI (gene of interest) is inserted as oaHDR machinery (left). Because Rad51 stabilize the exposed single-strand DNA, Rad51 deficient may cause large deletion.
