# Supplementary material
Source: PubMed Central journal article supplement (PMC6796851)
Supplement: 41422_2019_213_MOESM10_ESM.pdf [file 41422_2019_213_MOESM10_ESM.pdf]

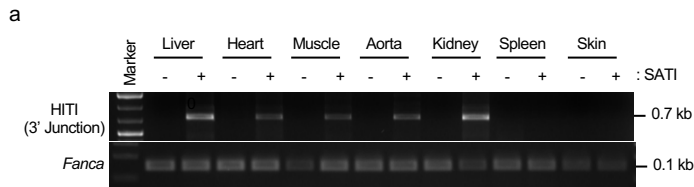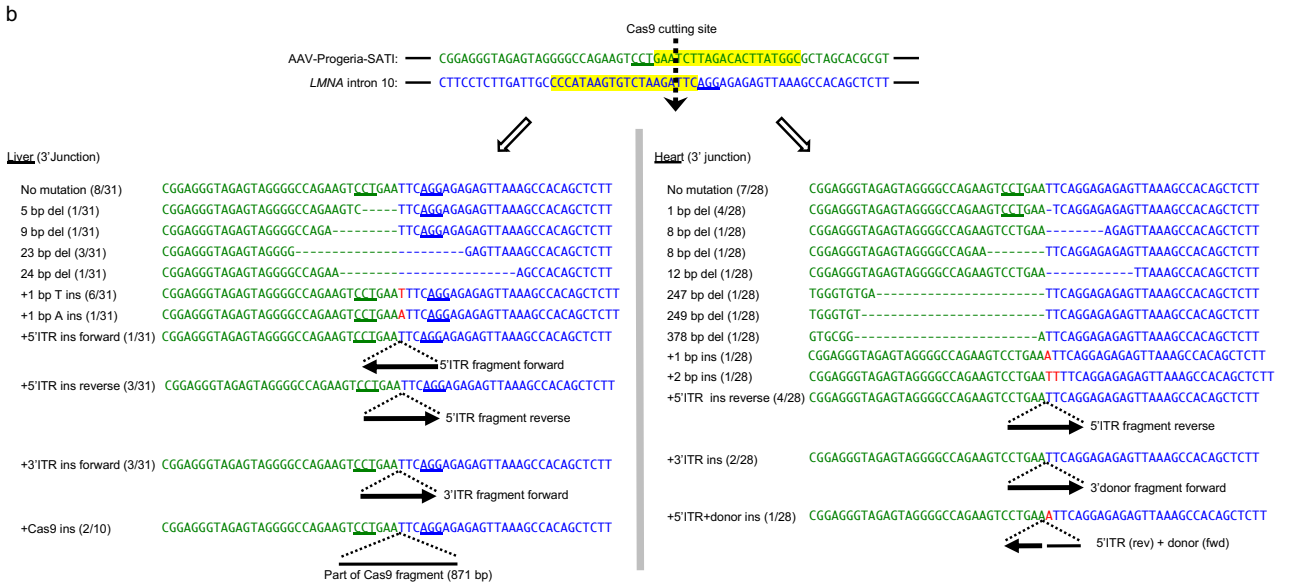

**Supplementary Figure S10 | Knock-in analyses of the gene-corrected progeria mice with SATI treatment.** **a** Validation of HITI-mediated gene knock-in by PCR using the genomic template from various tissues of the AAV-Progeria-SATI treated mouse at day 100. Blue half-arrows in Supplementary information Fig. S8a are designed PCR primers for detecting HITI. *Fanca* gene is indicated as internal control. **b** Sequencing analyses of 3' junction site of liver (left) and heart (right) cells at day 100 via IV AAV-Progeria-SATI injections. Broken arrow, Cas9 cutting site. Yellow highlight is indicated gRNA sequence. Sequence indicated as green is inserted sequence derived from donor vector. Sequence indicated as blue is targeted genomic sequence. Sequence indicated as red is an insertion.
