# Supplementary material
Source: PubMed Central journal article supplement (PMC6796851)
Supplement: 41422_2019_213_MOESM11_ESM.pdf [file 41422_2019_213_MOESM11_ESM.pdf]

a

| Analyzed organ | Total read (gRNA target) | Indels |      | HITI  |      | Total read (c.1827 site) | Gene correction |      |
|----------------|--------------------------|--------|------|-------|------|--------------------------|-----------------|------|
|                |                          | Read   | %    | Read  | %    |                          | Read            | %    |
| Liver          | 853230                   | 54514  | 6.39 | 14888 | 1.74 | 886972                   | 18256           | 2.06 |
| Heart          | 877839                   | 10905  | 1.24 | 1916  | 0.22 | 1346160                  | 4523            | 0.34 |
| Muscle         | 856777                   | 3462   | 0.40 | 717   | 0.08 | 1543707                  | 2141            | 0.14 |

b

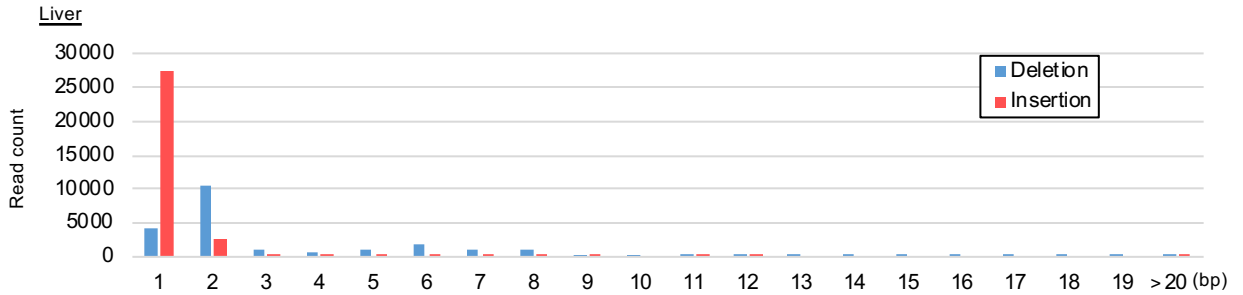

c

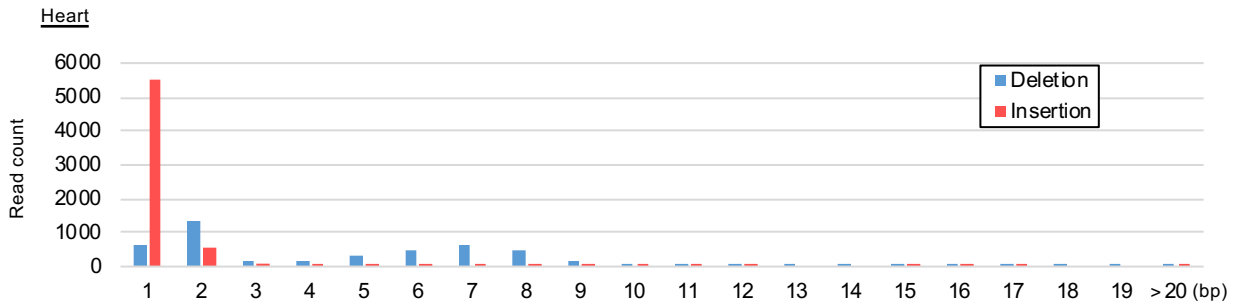

d

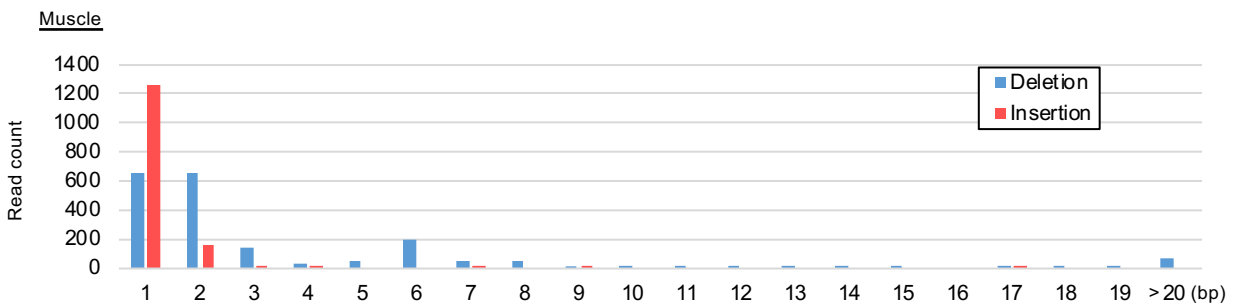

e

| Target name | Sequence                | Indel (%) |
|-------------|-------------------------|-----------|
| On          | CCATAAGTGTCTAAGATTCAAG  | 7.7       |
| OTS1        | GTCATAATTGTCTAAGATTATAG | 0.0094    |
| OTS2        | GCCATAAAGTTCTAAGATTCAAG | 0.0046    |
| OTS3        | GACATTTGTGTCTAAGATTCAAG | 0.000035  |
| OTS4        | GCAATGAGGGTCTAAGATTCTAG | 0.0038    |
| OTS5        | GAAATAGGTTTCTAAGATTCTGG | 0.041     |
| OTS6        | GCCCAGGTTTCTAAGATTCTAG  | 0.000087  |
| OTS7        | GTCATCAATTTCTAAGATTCCAG | 0.051     |
| OTS8        | GCCACAAGTGACTAAGATTAAG  | 0.00017   |
| OTS9        | GCCAGAAGTGGCTAAGATTATGG | 0.00019   |
| OTS10       | TTAATAAGTGTCTAAGATTCAAG | 0.000033  |

**Supplementary Figure S11 | NGS analysis in SATI-treated mice.** **a** Read count (Read) and genome editing (indels, HITI and correction) efficiency (%) by deep sequencing from the indicated organs. **b-d** Distribution of indel size in liver (**b**), heart (**c**), and muscle (**d**). Size of indel (bp) are indicated at bottom. **e** List of on-target site (On, *Lmna* intron 10) and off-target sites (OTS) that were used to determine the indel frequency of SATI mediated genome editing using genomic DNA isolated from the liver of progeria mouse at day 100. The nucleotide letters shown in red are the individual mismatches in predicted off-target sites.
