# Supplementary material
Source: PubMed Central journal article supplement (PMC6796851)
Supplement: 41422_2019_213_MOESM12_ESM.pdf [file 41422_2019_213_MOESM12_ESM.pdf]

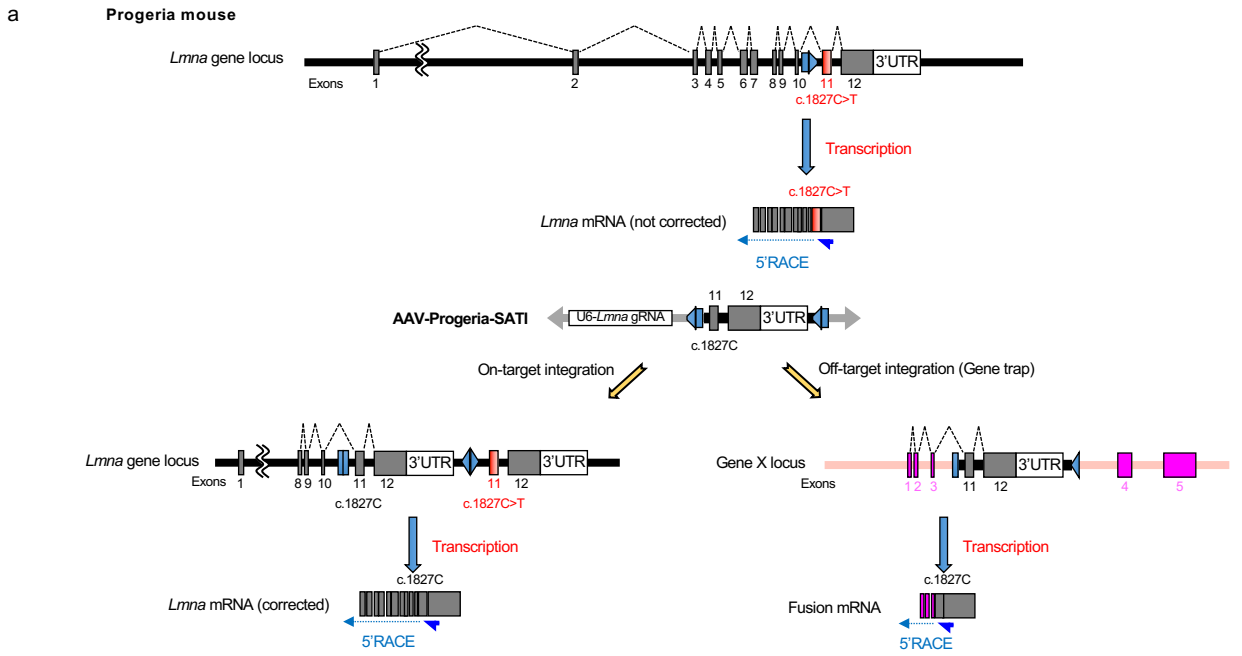

**b**

| Liver (day 100)                     |             | Heart (day 100)                     |             |
|-------------------------------------|-------------|-------------------------------------|-------------|
| #1                                  | #2          | #1                                  |             |
| Captured exon                       | # of clones | Captured exon                       | # of clones |
| <i>Lmna</i> exon 10 (not corrected) | 57          | <i>Lmna</i> exon 10 (not corrected) | 28          |
| <i>Lmna</i> exon 10 (corrected)     | 4           | <i>Lmna</i> exon 10 (corrected)     | 6           |
| <i>Alb</i> exon 7                   | 3           | <i>Alb</i> exon 5                   | 2           |
| <i>Alb</i> exon 9                   | 5           | <i>Alb</i> exon 7                   | 9           |
| <i>Alb</i> exon 12                  | 7           | <i>Alb</i> exon 9                   | 10          |
| <i>Alb</i> exon 13                  | 7           | <i>Alb</i> exon 10                  | 4           |
| <i>Trf</i> exon 9                   | 2           | <i>Alb</i> exon 12                  | 9           |
| <i>Trf</i> exon 15                  | 3           | <i>Alb</i> exon 13                  | 9           |
| <i>Igf1bp1</i> exon 3               | 1           | <i>Alb</i> exon 14                  | 1           |
| <i>Ahsg</i> exon 4                  | 1           | <i>Trt</i> exon 3                   | 2           |
| <i>Ahsg</i> exon 5                  | 1           | <i>Igf1bp1</i> exon 3               | 1           |
| <i>Apob</i> exon 8                  | 1           | <i>Ahsg</i> exon 5                  | 1           |
| <i>Apob</i> exon 15                 | 1           | <i>Apob</i> exon 9                  | 1           |
| Total                               | 93          | Total                               | 83          |

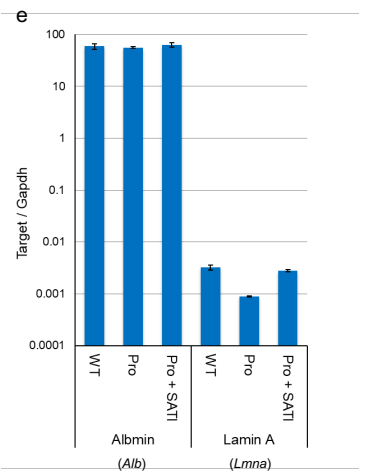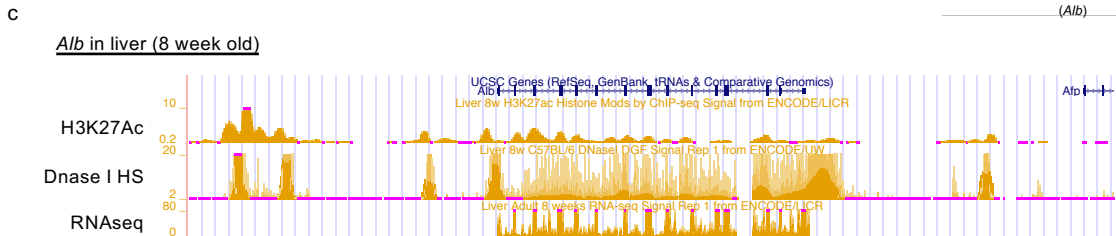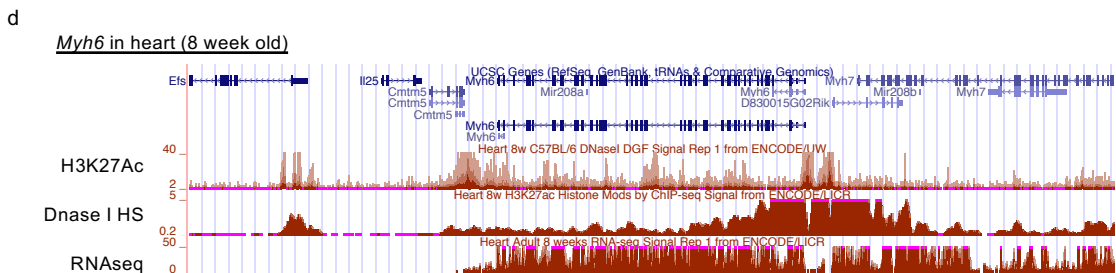

**Supplementary Figure S12 | Genome-wide off-target analysis in the liver and heart of SATI-treated progeria mice at day 100.** **a** The intronic SATI-mediated gene-targeting strategy knock-ins a “half-gene of *Lmna*” which including splicing acceptor. The off-target integration of the donor captures the transcript of the integration site and express as a fusion gene. The captured exons including from on target *Lmna* exon 10 and unknown off-target gene were determined with 5'RACE and sequencing. Blue half-arrows, PCR primers for 5'RACE. **b** The list of the captured exons in liver and heart from SATI-treated mice at day 100. The data was obtained from two mice (#1 and #2). **c** Chromatin (H3K27Ac and DNaseI HS) and expression (RNAseq) status of the major off-target gene, *Alb*, in the liver of 8-week-old mice. **d** Chromatin (H3K27Ac and DNaseI HS) and expression (RNAseq) status of the major off-target gene, *Myh6*, in the heart of 8-week-old mice. **e** RT-qPCR analysis for the expression ratio of *Albmin* to *Gapdh* (left) and *Lamin A* to *Gapdh* (right) in liver from SATI-treated mouse at day 100 ( $n = 3$ ). Data are represented as mean  $\pm$  s.e.m.
